# Supplementary material for: Epidemiological characteristics of people living with HIV on antiretroviral therapy (ART) in Pointe-Noire, Republic of Congo
Source: Research Square preprint supplement (doi:10.21203/rs.3.rs-7622263/v1), 2025-10-08
Supplement: Supplementary file 2 [file 7b8c25245e8393dc86067a52.docx]

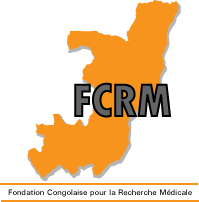


**Fondation Congolaise pour la Recherche Médicale**

**Cité OMS/AFRO, Villa D6**

**Brazzaville, Congo**

**ASSENT FORM FOR CHILDREN TAKING PART IN THE STUDY**

(Ages : less than 18 years old)

**Title of the protocol :** Characterization of the resistance profile of HIV strains to antiretrovirals in infected Congolese children, adolescents and young adults on treatment.

**Each participant must receive a copy of this information sheet.**

**Participant code: ………………………………………….……………………………**

**Initials of participant or legal guardian: ………………………………………………….**

We would like to talk about the research study we are conducting at the Congolese Foundation for Medical Research. Scientific research is a special mean of finding or understanding factors that may impact the transmission or the severity of diseases. We are looking to understand the situation of human immunodeficiency virus (HIV) infection in Pointe Noire city, in particular why your viral load is high and the other is not (or vice versa) and why sometimes your treatment does not work, what are the changes in this disease in relation to the drugs responsible for this phenomenon

We would like you to take part in this study.

If you decide to participate in this study, here are some importants points :

- The physician will check your body temperature, weight and height

- The trained technician will collect at least 5 mL of your venus blood by using a steril needle.

**Could something bad happen to me ?**

We want to tell you that something could hurt you in this study. The needle used in this study may hurt you when you are pricked

**Could anything good happen to me?**

By taking part in this study, we'll be able to give you the tests you need to improve your treatment.

**Do I have another choice?**

You can choose not to take part in this study, which will have no impact on your routine therapeutic follow-up at your treatment center.

**Will anyone know that I'm participating in this study?**

We won't tell anyone except your parents/guardians that you participated in this study, but your answers will remain secret. When we've finished with this study, we'll make a report on what we've found, but we won't use your name.

Before you say yes, ask the investigator some more questions so that he can tell you more about this study and anything else you do not understand.

**What happen if I do not want to participate?**

You will not be taking part in this study. That is up to you. If you say yes now, and change your idea later, that is okay too. All you have to do is tell us.

If you want to be in this study, we kindly request you to sign or write your name.

 Yes, I will be in this study.  No, I do not want

Date, Pointe-Noire, …………………………………………………

__________________________ ___________________ ____________

Name of child Signature of child Date

__________________________ ___________________ ____________

Person having obtained consent Signature Date
