# Supplementary material for: Epidemiological characteristics of people living with HIV on antiretroviral therapy (ART) in Pointe-Noire, Republic of Congo
Source: Research Square preprint supplement (doi:10.21203/rs.3.rs-7622263/v1), 2025-10-08
Supplement: Supplementary file 3 [file f88a0120abb37a74906918e9.docx]

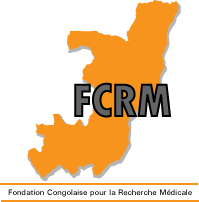
**Fondation Congolaise pour la Recherche Médicale**

**Cité OMS/AFRO, Villa D6**

**Brazzaville, Congo**

**INFORMATION NOTE**

**Title of the protocol :** Characterization of the resistance profile of HIV strains to antiretrovirals in infected Congolese children, adolescents and young adults on treatment.

**Each participant or his/her legal guardian (in the case of a minor) must receive a copy of this information sheet.**

**Study overview:**

The human immunodeficiency virus (HIV) infection is responsible for the Acquired Immunodeficiency Syndrome (AIDS) disease, which affects many people in our country. The HIV is a type of virus that can cause a disease called AIDS. HIV infection affects the immune system, i.e. the body's natural defenses against disease. This disease affects many people in our country. If left untreated, it can lead to serious complications. Even worldwide, HIV/AIDS remains a major public health problem. However, antiretroviral treatments (ART) are becoming more and more powerful, making it possible to believe that an HIV-positive young adult who starts treatment quickly can live to 80 or more. These treatments often result in an undetectable viral load, even if the virus is still not eradicated from the body. But the virus stops multiplying in the HIV-positive person's body, and symptoms also disappear. This reduces the risk of HIV transmission. But when treatment is not properly followed, resistance to certain drugs - i.e. changes in the genes - can occur. And this can mean that these drugs are no longer effective against the virus. That is why it is essential that treatment is tailored to each individual patient, with tests to detect this. It is therefore very important to test for virus resistance, and thus optimize the treatment regimen on an individual basis. But in our country, studies are not very advanced. Some countries have already been able to considerably improve the treatment of their patients by testing for HIV drug resistance. That's why we are proposing to conduct this study, with the aim of having a better understanding of the current situation of HIV resistance in our country, and improving care in terms of treatment. We need to include HIV-positive patients on treatment in our study. For parents of children aged between 3 and 17, we will need your consent to include your children.

Aims :

1. Determine the viral load in children, adolescents and adults on antiretroviral therapy;
2. Characterize the HIV resistance in biological samples from children, adolescents and adults;
3. Assess the risk factors associated with antiretroviral resistance in the study population

**PARTICIPANT BENEFITS :**

- Testing for HIV resistance mutations in relation to treatments administered to optimize treatment;
- Be informed of results.

**CONSTRAINTS :**

- Agree to take blood samples (at the request of the attending physician to diagnose resistance mutations)

**CONFIDENTIALITY AND INDIVIDUAL RIGHTS**

All observations, results and prescriptions provide by the physician, are subject to medical confidentiality and will not be disclosed to third parties. Participation in the project is voluntary. However, contrary to our wishes, the person may decide at any time to withdraw from the study without giving any reason. The person to be included in our study has the right to ask any questions related to the project that would merit answers from members of the research team. We will kindly request the persons to be included to agree to the publication of the results, while respecting their anonymity and rights relating to private property.

**STEPS :**

**- MEDICALE CONSULTATION FOR INCLUSION**

Before your inclusion in the study, your healthtaker at the centre Association AVENIR POSITIF will take your identity, he will ask you abou your previous history on the disease. He will examine you and provide you with your current health state.

These information will be included in your health folder and you will be informed about all.

**- LES EXAMENS BIOLOGIQUES**

After the consultation with the physician, the trained technician will proceed by collecting a venus blood sample. A vollume of 2 or 5 mL will be collected in the EDTA tube which will serve for molecular analysis.

The viral load will be measured, the resistance of the virus against anti-retroviral drugs will be characterized along the genetic materiel of the virus and epidemiological risk factors will be assessed.
